# Supplementary material for: Chronic Study on Brainwave Authentication in a Real-Life Setting: An LSTM-Based Bagging Approach
Source: MDPI journal article supplement (doi:10.3390/bios11100404), 2021-10-18
Supplement: s1 [file s1]

**Table S1.** Average results of accuracies per subject from 5-fold cross-validation, reported in the form of: mean (std).

| Subject | Left perf.mo-<br>tor | Right<br>perf.motor | Combined<br>perf.motor | Left<br>imag.motor | Right<br>imag.motor | Combined<br>imag.motor | Combined<br>task |
|---------|----------------------|---------------------|------------------------|--------------------|---------------------|------------------------|------------------|
| 1       | 0.893 (0.028)        | 0.867 (0.030)       | 0.926 (0.006)          | 0.889 (0.032)      | 0.888 (0.033)       | 0.928 (0.009)          | 0.930 (0.005)    |
| 2       | 0.852 (0.041)        | 0.838 (0.066)       | 0.897 (0.037)          | 0.865 (0.029)      | 0.822 (0.086)       | 0.893 (0.037)          | 0.904 (0.031)    |
| 3       | 0.906 (0.046)        | 0.880 (0.030)       | 0.931 (0.030)          | 0.893 (0.048)      | 0.885 (0.043)       | 0.927 (0.031)          | 0.934 (0.023)    |
| 4       | 0.946 (0.017)        | 0.951 (0.015)       | 0.954 (0.013)          | 0.946 (0.017)      | 0.944 (0.015)       | 0.953 (0.012)          | 0.953 (0.010)    |
| 5       | 0.916 (0.020)        | 0.922 (0.021)       | 0.950 (0.006)          | 0.902 (0.018)      | 0.917 (0.030)       | 0.944 (0.017)          | 0.950 (0.007)    |
| 6       | 0.949 (0.030)        | 0.944 (0.027)       | 0.964 (0.015)          | 0.947 (0.028)      | 0.938 (0.021)       | 0.962 (0.016)          | 0.966 (0.015)    |
| 7       | 0.913 (0.018)        | 0.885 (0.046)       | 0.954 (0.020)          | 0.913 (0.027)      | 0.879 (0.056)       | 0.951 (0.018)          | 0.955 (0.021)    |
| 8       | 0.838 (0.048)        | 0.861 (0.074)       | 0.904 (0.030)          | 0.850 (0.022)      | 0.886 (0.058)       | 0.919 (0.013)          | 0.920 (0.011)    |
| 9       | 0.904 (0.016)        | 0.926 (0.032)       | 0.935 (0.029)          | 0.894 (0.007)      | 0.929 (0.036)       | 0.939 (0.026)          | 0.936 (0.030)    |
| 10      | 0.891 (0.034)        | 0.871 (0.044)       | 0.913 (0.034)          | 0.892 (0.030)      | 0.888 (0.046)       | 0.915 (0.029)          | 0.917 (0.034)    |
| 11      | 0.884 (0.042)        | 0.883 (0.053)       | 0.936 (0.025)          | 0.877 (0.044)      | 0.893 (0.048)       | 0.938 (0.025)          | 0.940 (0.027)    |
| 12      | 0.893 (0.051)        | 0.867 (0.020)       | 0.926 (0.012)          | 0.889 (0.051)      | 0.888 (0.021)       | 0.928 (0.015)          | 0.930 (0.008)    |
| 13      | 0.852 (0.042)        | 0.838 (0.055)       | 0.897 (0.027)          | 0.865 (0.036)      | 0.822 (0.065)       | 0.893 (0.044)          | 0.904 (0.025)    |
| 14      | 0.906 (0.060)        | 0.880 (0.028)       | 0.931 (0.018)          | 0.893 (0.045)      | 0.885 (0.036)       | 0.927 (0.014)          | 0.934 (0.009)    |
| 15      | 0.946 (0.053)        | 0.951 (0.050)       | 0.954 (0.031)          | 0.946 (0.064)      | 0.944 (0.053)       | 0.953 (0.036)          | 0.953 (0.028)    |
| Mean    | 0.884 (0.041)        | 0.887 (0.034)       | 0.926 (0.024)          | 0.883 (0.037)      | 0.888 (0.036)       | 0.925 (0.026)          | 0.930 (0.021)    |

**Table S2.** Average results of FAR per subject from 5-fold cross-validation, reported in the form of: mean (std).

| Subject | Left perf.mo-<br>tor | Right<br>perf.motor | Combined<br>perf.motor | Left<br>imag.motor | Right<br>imag.motor | Combined<br>imag.motor | Combined<br>task |
|---------|----------------------|---------------------|------------------------|--------------------|---------------------|------------------------|------------------|
| 1       | 0.051 (0.030)        | 0.080 (0.030)       | 0.010 (0.006)          | 0.053 (0.036)      | 0.051 (0.032)       | 0.006 (0.007)          | 0.004 (0.004)    |
| 2       | 0.107 (0.036)        | 0.104 (0.056)       | 0.041 (0.033)          | 0.093 (0.025)      | 0.117 (0.084)       | 0.042 (0.036)          | 0.030 (0.029)    |
| 3       | 0.077 (0.047)        | 0.096 (0.029)       | 0.036 (0.023)          | 0.087 (0.048)      | 0.092 (0.044)       | 0.038 (0.026)          | 0.028 (0.020)    |
| 4       | 0.021 (0.018)        | 0.013 (0.011)       | 0.008 (0.007)          | 0.019 (0.014)      | 0.024 (0.019)       | 0.012 (0.007)          | 0.008 (0.006)    |
| 5       | 0.062 (0.028)        | 0.057 (0.031)       | 0.021 (0.020)          | 0.075 (0.031)      | 0.064 (0.037)       | 0.027 (0.029)          | 0.020 (0.018)    |
| 6       | 0.041 (0.037)        | 0.049 (0.030)       | 0.023 (0.021)          | 0.041 (0.036)      | 0.053 (0.026)       | 0.025 (0.022)          | 0.020 (0.020)    |
| 7       | 0.062 (0.034)        | 0.082 (0.045)       | 0.010 (0.007)          | 0.066 (0.042)      | 0.086 (0.070)       | 0.013 (0.008)          | 0.008 (0.006)    |
| 8       | 0.100 (0.052)        | 0.078 (0.072)       | 0.025 (0.032)          | 0.090 (0.019)      | 0.052 (0.051)       | 0.011 (0.012)          | 0.009 (0.011)    |
| 9       | 0.062 (0.023)        | 0.046 (0.018)       | 0.021 (0.016)          | 0.072 (0.030)      | 0.043 (0.029)       | 0.018 (0.017)          | 0.018 (0.016)    |
| 10      | 0.069 (0.027)        | 0.101 (0.043)       | 0.040 (0.030)          | 0.074 (0.028)      | 0.078 (0.053)       | 0.038 (0.030)          | 0.033 (0.029)    |
| 11      | 0.077 (0.049)        | 0.079 (0.033)       | 0.022 (0.010)          | 0.088 (0.060)      | 0.071 (0.041)       | 0.023 (0.015)          | 0.018 (0.010)    |
| 12      | 0.130 (0.062)        | 0.056 (0.019)       | 0.018 (0.009)          | 0.114 (0.065)      | 0.055 (0.030)       | 0.011 (0.015)          | 0.008 (0.006)    |
| 13      | 0.101 (0.050)        | 0.088 (0.067)       | 0.038 (0.031)          | 0.127 (0.043)      | 0.128 (0.080)       | 0.068 (0.051)          | 0.035 (0.027)    |
| 14      | 0.063 (0.060)        | 0.085 (0.038)       | 0.014 (0.019)          | 0.076 (0.043)      | 0.092 (0.039)       | 0.017 (0.011)          | 0.008 (0.010)    |
| 15      | 0.136 (0.047)        | 0.079 (0.049)       | 0.040 (0.033)          | 0.119 (0.053)      | 0.068 (0.053)       | 0.039 (0.037)          | 0.030 (0.031)    |
| Mean    | 0.077 (0.032)        | 0.073 (0.024)       | 0.025 (0.012)          | 0.080 (0.029)      | 0.072 (0.028)       | 0.026 (0.017)          | 0.019 (0.011)    |

**Table S3.** Average results of FRR per subject from 5-fold cross-validation, reported in the form of: mean (std).

| Subject | Left perf.mo-<br>tor | Right<br>perf.motor | Combined<br>perf.motor | Left<br>imag.motor | Right<br>imag.motor | Combined<br>imag.motor | Combined<br>task |
|---------|----------------------|---------------------|------------------------|--------------------|---------------------|------------------------|------------------|
| 1       | 0.056 (0.007)        | 0.053 (0.007)       | 0.064 (0.002)          | 0.058 (0.009)      | 0.062 (0.008)       | 0.066 (0.002)          | 0.066 (0.002)    |
| 2       | 0.041 (0.013)        | 0.057 (0.013)       | 0.062 (0.009)          | 0.042 (0.009)      | 0.061 (0.002)       | 0.065 (0.002)          | 0.065 (0.003)    |
| 3       | 0.017 (0.006)        | 0.023 (0.011)       | 0.033 (0.010)          | 0.021 (0.010)      | 0.023 (0.012)       | 0.036 (0.011)          | 0.038 (0.011)    |
| 4       | 0.034 (0.018)        | 0.036 (0.013)       | 0.038 (0.011)          | 0.035 (0.016)      | 0.032 (0.016)       | 0.036 (0.014)          | 0.038 (0.010)    |
| 5       | 0.022 (0.013)        | 0.021 (0.017)       | 0.029 (0.015)          | 0.023 (0.015)      | 0.019 (0.015)       | 0.029 (0.014)          | 0.031 (0.014)    |
| 6       | 0.010 (0.011)        | 0.007 (0.005)       | 0.013 (0.011)          | 0.012 (0.012)      | 0.009 (0.007)       | 0.013 (0.013)          | 0.013 (0.013)    |
| 7       | 0.025 (0.017)        | 0.033 (0.020)       | 0.037 (0.018)          | 0.021 (0.016)      | 0.035 (0.022)       | 0.036 (0.021)          | 0.037 (0.019)    |
| 8       | 0.063 (0.011)        | 0.062 (0.009)       | 0.071 (0.002)          | 0.060 (0.009)      | 0.063 (0.010)       | 0.071 (0.002)          | 0.071 (0.001)    |
| 9       | 0.035 (0.023)        | 0.029 (0.020)       | 0.045 (0.024)          | 0.034 (0.024)      | 0.029 (0.021)       | 0.043 (0.024)          | 0.046 (0.023)    |
| 10      | 0.040 (0.019)        | 0.029 (0.011)       | 0.047 (0.013)          | 0.034 (0.019)      | 0.035 (0.013)       | 0.047 (0.010)          | 0.050 (0.011)    |
| 11      | 0.039 (0.035)        | 0.038 (0.034)       | 0.042 (0.035)          | 0.036 (0.034)      | 0.036 (0.033)       | 0.038 (0.036)          | 0.042 (0.033)    |
| 12      | 0.053 (0.017)        | 0.056 (0.012)       | 0.068 (0.007)          | 0.053 (0.017)      | 0.059 (0.014)       | 0.069 (0.007)          | 0.069 (0.005)    |
| 13      | 0.068 (0.009)        | 0.064 (0.014)       | 0.073 (0.006)          | 0.060 (0.013)      | 0.055 (0.017)       | 0.070 (0.007)          | 0.073 (0.002)    |
| 14      | 0.055 (0.006)        | 0.033 (0.014)       | 0.056 (0.007)          | 0.048 (0.011)      | 0.033 (0.012)       | 0.052 (0.008)          | 0.059 (0.003)    |
| 15      | 0.027 (0.010)        | 0.063 (0.005)       | 0.066 (0.004)          | 0.030 (0.019)      | 0.063 (0.000)       | 0.068 (0.006)          | 0.069 (0.004)    |
| Mean    | 0.039 (0.017)        | 0.040 (0.018)       | 0.050 (0.018)          | 0.038 (0.015)      | 0.041 (0.018)       | 0.049 (0.018)          | 0.051 (0.018)    |

**Table S4.** Wilcoxon signed-rank test results for pair-wise paradigm comparison of accuracies: marked in bold when statistically significant ( $\alpha = 0.05$ ).

| Para-<br>digms                   | Left perf.mo-<br>tor | Right perf.mo-<br>tor | Combined<br>perf.motor | Left imag.mo-<br>tor | Right<br>imag.motor | Combined<br>imag.motor | Combined<br>task |
|----------------------------------|----------------------|-----------------------|------------------------|----------------------|---------------------|------------------------|------------------|
| Left<br>perf.mo-<br>tor          |                      | 0.96387               | <b>0.00006</b>         | 0.55994              | 0.93408             | <b>0.00006</b>         | <b>0.00006</b>   |
| Right<br>perf.mo-<br>tor         |                      |                       | <b>0.00006</b>         | 0.58972              | 0.87897             | <b>0.00006</b>         | <b>0.00006</b>   |
| Com-<br>bined<br>perf.mo-<br>tor |                      |                       |                        | <b>0.00006</b>       | <b>0.00006</b>      | 0.85449                | <b>0.00031</b>   |
| Left<br>imag.mo-<br>tor          |                      |                       |                        |                      | 0.5614              | <b>0.00006</b>         | <b>0.00006</b>   |
| Right<br>imag.mo-<br>tor         |                      |                       |                        |                      |                     | <b>0.00006</b>         | <b>0.00006</b>   |
| Com-<br>bined<br>imag.mo-<br>tor |                      |                       |                        |                      |                     |                        | <b>0.0014</b>    |
| Com-<br>bined<br>task            |                      |                       |                        |                      |                     |                        |                  |

**Table S5.** Wilcoxon signed-rank test results for pair-wise paradigm comparison of FARs: marked in bold when statistically significant ( $\alpha = 0.05$ ).

| Paradigms           | Left perf.motor | Right perf.motor | Combined perf.motor | Left imag.mo-tor | Right imag.mo-tor | Combined imag.mo-tor | Combined task  |
|---------------------|-----------------|------------------|---------------------|------------------|-------------------|----------------------|----------------|
| Left perf.motor     |                 | 0.94611          | <b>0.00006</b>      | 0.5719           | 0.9032            | <b>0.00006</b>       | <b>0.00006</b> |
| Right perf.motor    |                 |                  | <b>0.00006</b>      | 0.47913          | 0.85883           | <b>0.00006</b>       | <b>0.00006</b> |
| Combined perf.motor |                 |                  |                     | <b>0.00006</b>   | <b>0.00006</b>    | 0.71124              | <b>0.00012</b> |
| Left imag.motor     |                 |                  |                     |                  | 0.57074           | <b>0.00006</b>       | <b>0.00006</b> |
| Right imag.motor    |                 |                  |                     |                  |                   | <b>0.00006</b>       | <b>0.00006</b> |
| Combined imag.motor |                 |                  |                     |                  |                   |                      | <b>0.00012</b> |
| Combined task       |                 |                  |                     |                  |                   |                      |                |

**Table S6.** Wilcoxon signed-rank test results for pair-wise paradigm comparison of FRRs: marked in bold when statistically significant ( $\alpha = 0.05$ ).

| Paradigms           | Left perf.motor | Right perf.motor | Combined perf.motor | Left imag.mo-tor | Right imag.mo-tor | Combined imag.mo-tor | Combined task  |
|---------------------|-----------------|------------------|---------------------|------------------|-------------------|----------------------|----------------|
| Left perf.motor     |                 | 0.96637          | <b>0.00006</b>      | 0.36353          | 0.77368           | <b>0.00067</b>       | <b>0.00006</b> |
| Right perf.motor    |                 |                  | <b>0.00006</b>      | 0.79187          | 0.5957            | <b>0.00024</b>       | <b>0.00006</b> |
| Combined perf.motor |                 |                  |                     | <b>0.00006</b>   | <b>0.00006</b>    | 0.59033              | <b>0.00018</b> |
| Left imag.motor     |                 |                  |                     |                  | 0.57166           | <b>0.00006</b>       | <b>0.00006</b> |
| Right imag.motor    |                 |                  |                     |                  |                   | <b>0.00006</b>       | <b>0.00006</b> |
| Combined imag.motor |                 |                  |                     |                  |                   |                      | <b>0.00037</b> |
| Combined task       |                 |                  |                     |                  |                   |                      |                |
